# Supplementary material for: The Preventive Effects of Salubrinal against Pyrethroid-Induced Disruption of Adult Hippocampal Neurogenesis in Mice
Source: MDPI journal article supplement (doi:10.3390/ijms242115614), 2023-10-26
Supplement: s1 [file s1]

**Table S1.** Total BrdU+, Ki-67+, DCX+, CHOP+, and caspase-12+ cells in the DG of the hippocampus following acute deltamethrin exposure in mice.

| Cell Type            | Control | Salubrinal | Deltamethrin | Salubrinal + Deltamethrin |
|----------------------|---------|------------|--------------|---------------------------|
| BrdU+ cells          | 183     | 177        | 81*          | 150 <sup>#</sup>          |
| Ki-67+ cells         | 245     | 240        | 147*         | 218 <sup>#</sup>          |
| DCX+ cells           | 1130    | 1147       | 775*         | 1017 <sup>#</sup>         |
| CHOP+/BrdU+ cells    | 15      | 13         | 56*          | 22 <sup>#</sup>           |
| CHOP+/Ki67+ cells    | 14      | 12         | 60*          | 24 <sup>#</sup>           |
| Casp 12+/BrdU+ cells | 15      | 12         | 66*          | 30 <sup>#</sup>           |
| Casp 12+/Ki67+ cells | 16      | 15         | 69*          | 27 <sup>#</sup>           |

Total BrdU+, Ki-67+, DCX+, and CHOP+ cells were visualized through immunofluorescence. Positive cells in the subgranular zone (SGZ) for BrdU and Ki-67, and in the SGZ and granule cell layer (GCL) for DCX, were manually counted at high magnification (40×) using an All-in-One Fluorescence Microscope (BZ-X810, Keyence Corporation, Itasca, IL). Positive cell quantification was performed on 12 sections per animal with 5 animals in each group. The group mean was obtained by averaging the total counts from these sections. Statistical comparisons were made using two-way ANOVA with Bonferroni's post hoc test. An asterisk (\*) indicates a significant difference from the control group and a hashtag (#) indicates a significant difference from deltamethrin when compared with the deltamethrin + salubrinal group (BrdU+ cells:  $F_{3,12} = 7.29$ ;  $p < 0.048$ ; Ki-67+ cells:  $F_{3,16} = 3.77$ ;  $p < 0.032$ ; DCX+ cells:  $F_{3,16} = 3.67$ ;  $p < 0.035$ ; CHOP+/BrdU+:  $F_{3,12} = 16.85$ ;  $p < 0.001$ ; CHOP+/Ki-67+ cells:  $F_{3,12} = 11.99$ ;  $p < 0.005$ ; Caspase 12+/BrdU+ cells:  $F_{3,12} = 10.20$ ;  $p < 0.001$ ; Caspase 12+/Ki67+ cells:  $F_{3,12} = 34.96$ ;  $p < 0.001$ ).

**Table S2.** Total BrdU+, Ki-67+, DCX+ and CHOP+ cells in the DG of the hippocampus of caspase-12 KO mice following acute exposure to deltamethrin.

| Cell Type         | WT Cont | Caspase 12 KO Cont | WT Del | Caspase 12 KO + Del |
|-------------------|---------|--------------------|--------|---------------------|
| BrdU+ cells       | 171     | 167                | 93*    | 153 <sup>#</sup>    |
| Ki-67+ cells      | 255     | 287                | 112*   | 206 <sup>#</sup>    |
| DCX+ cells        | 1209    | 1231               | 486*   | 891 <sup>#</sup>    |
| CHOP+/BrdU+ cells | 12      | 9                  | 56*    | 22 <sup>#</sup>     |
| CHOP+/Ki67+ cells | 11      | 10                 | 62*    | 30 <sup>#</sup>     |

Total BrdU+, Ki-67+, DCX+, and CHOP+ cells were visualized through immunofluorescence. Positive cells in the subgranular zone (SGZ) for BrdU and Ki-67, and in the SGZ and granule cell layer (GCL) for DCX, were manually counted at high magnification (40×) using an All-in-One Fluorescence Microscope (BZ-X810, Keyence Corporation, Itasca, IL). Positive cell quantification was performed on 12 sections per animal with 5 animals in each group. The group mean was obtained by averaging the total counts from these sections. Statistical comparisons were made using two-way ANOVA with Bonferroni's post hoc test. An asterisk (\*) indicates a significant difference from the control group and a hashtag (#) indicates a significant difference from deltamethrin when compared with the deltamethrin + salubrinal group (BrdU+ cells:  $F_{3,12} = 8.81$ ;  $p < 0.0023$ ; Ki-67+ cells:  $F_{3,16} = 4.92$ ;  $p < 0.01$ ; DCX+ cells:  $F_{3,16} = 8.13$ ;  $p < 0.002$ ; CHOP+/BrdU+ cells:  $F_{3,12} = 18.21$ ;  $p < 0.001$ ; CHOP+/Ki67+ cells:  $F_{3,12} = 16.01$ ;  $p < 0.002$ ).
